# Supplementary material
Source: MDPI journal article supplement (https://www.mdpi.com/2073-4395/11/4/780)
Supplement: s1 [file s1]

**Table S1.** Root length (RL), root diameter (RD), root fresh weight (RFW), and leaf area index (LAI), SPAD index of sugar beet as affected by the interactions of two cultivars [e.g., Kawemira (Cv1) and BTS 301 (Cv2)] grown under different fertilizer levels of potassium [e.g., 120 (K<sub>120</sub>) and 180 kg ha<sup>-1</sup> (K<sub>180</sub>)] and foliar zinc [e.g., 0 (Zn<sub>0</sub>), 150 (Zn<sub>150</sub>), and 300 ppm (Zn<sub>300</sub>)] under saline soil (EC<sub>e</sub> = 8.60 dS m<sup>-1</sup>) conditions (data pooled over both seasons).

| Treatment        |                   | RL                  | RD                   | RFW                       | LAI                 | SPAD index           |
|------------------|-------------------|---------------------|----------------------|---------------------------|---------------------|----------------------|
|                  |                   | (cm)                |                      | (kg plant <sup>-1</sup> ) |                     |                      |
| Cv1              | K <sub>120</sub>  | 25.0±0.3a           | 9.5±0.2a             | 0.83±0.02d                | 3.1±0.06d           | 43.0±0.4a            |
|                  | K <sub>180</sub>  | 26.9±0.2a           | 11.3±0.3a            | 1.16±0.05c                | 3.6±0.09c           | 46.6±0.2a            |
| Cv2              | K <sub>120</sub>  | 28.7±0.6a           | 12.2±0.2a            | 1.21±0.05b                | 4.2±0.10b           | 52.1±0.5a            |
|                  | K <sub>180</sub>  | 30.9±0.6a           | 13.9±0.2a            | 1.51±0.04a                | 5.2±0.16a           | 55.6±0.5a            |
| Cv1              | Zn <sub>0</sub>   | 25.3±0.5f           | 9.9±0.4a             | 0.88±0.05a                | 3.1±0.12f           | 43.6±0.7a            |
|                  | Zn <sub>150</sub> | 26.1±0.3e           | 10.4±0.4a            | 1.02±0.07a                | 3.3±0.10e           | 44.8±0.6a            |
|                  | Zn <sub>300</sub> | 26.5±0.3d           | 10.9±0.4a            | 1.08±0.08a                | 3.6±0.12d           | 46.0±0.5a            |
|                  | Zn <sub>0</sub>   | 28.9±0.8c           | 12.5±0.4a            | 1.25±0.06a                | 4.4±0.19c           | 52.9±0.8a            |
| Cv2              | Zn <sub>150</sub> | 29.8±0.7b           | 13.0±0.3a            | 1.38±0.06a                | 4.7±0.21b           | 53.8±0.7a            |
|                  | Zn <sub>300</sub> | 30.6±0.7a           | 13.6±0.3a            | 1.44±0.07a                | 5.0±0.23a           | 54.8±0.7a            |
| K <sub>120</sub> | Zn <sub>0</sub>   | 25.9±0.8f           | 10.2±0.5f            | 0.94±0.08f                | 3.4±0.19f           | 46.2±1.5f            |
|                  | Zn <sub>150</sub> | 27.0±0.7e           | 10.9±0.5e            | 1.04±0.07e                | 3.6±0.17e           | 47.6±1.4e            |
|                  | Zn <sub>300</sub> | 27.6±0.7d           | 11.4±0.5d            | 1.07±0.07d                | 3.8±0.20d           | 48.3±1.4d            |
|                  | Zn <sub>0</sub>   | 28.2±0.8c           | 12.2±0.5c            | 1.19±0.06c                | 4.1±0.25c           | 50.3±1.4c            |
| K <sub>180</sub> | Zn <sub>150</sub> | 28.9±0.8b           | 12.6±0.5b            | 1.36±0.07b                | 4.4±0.28b           | 51.1±1.4b            |
|                  | Zn <sub>300</sub> | 29.5±0.8a           | 13.0±0.5a            | 1.45±0.08a                | 4.8±0.30a           | 51.9±1.4a            |
| <i>p</i> -value  | Cv x K            | 0.256 <sup>ns</sup> | 0.081 <sup>ns</sup>  | 0.009 <sup>**</sup>       | 0.005 <sup>**</sup> | 0.811 <sup>ns</sup>  |
|                  | Cv x Z            | 0.030 <sup>*</sup>  | 0.103 <sup>ns</sup>  | 0.360 <sup>ns</sup>       | 0.013 <sup>*</sup>  | 0.183 <sup>ns</sup>  |
|                  | K x Z             | 0.026 <sup>*</sup>  | <0.001 <sup>**</sup> | <0.001 <sup>**</sup>      | 0.026 <sup>*</sup>  | <0.001 <sup>**</sup> |
|                  | Cv x K x Zn       | 0.750 <sup>ns</sup> | 0.260 <sup>ns</sup>  | 0.029 <sup>*</sup>        | 0.053 <sup>ns</sup> | 0.204 <sup>ns</sup>  |

\*, \*\* refer to the significant difference at  $p \leq 0.05$  and  $p \leq 0.01$ , respectively; and "ns" refers to non-significant difference. Means sharing the same letter in each column are not significantly different according to Duncan's multiple range test.

**Table S2.** Sucrose, pure sugar (PS), loss sugar (LS), and purity of sugar beet as affected by the interactions of two sugar beet cultivars [e.g., Kawemira (Cv1) and BTS 301 (Cv2)] grown under different fertilizer levels of potassium [e.g., 120 (K<sub>120</sub>) and 180 kg ha<sup>-1</sup> (K<sub>180</sub>)] and foliar zinc [e.g., 0 (Zn<sub>0</sub>), 150 (Zn<sub>150</sub>), and 300 ppm (Zn<sub>300</sub>)] under saline soil (EC<sub>e</sub> = 8.60 dS m<sup>-1</sup>) conditions (data pooled over both seasons).

| Treatment        |                   | Sucrose             | PS                  | LS                  | Purity              |
|------------------|-------------------|---------------------|---------------------|---------------------|---------------------|
|                  |                   | (%)                 |                     |                     |                     |
| Cv1              | K <sub>120</sub>  | 19.4±0.1a           | 16.8±0.2a           | 2.61±0.09a          | 86.5±0.5d           |
|                  | K <sub>180</sub>  | 20.5±0.2a           | 18.3±0.2a           | 2.26±0.10a          | 88.9±0.5c           |
| Cv2              | K <sub>120</sub>  | 21.1±0.3a           | 19.4±0.4a           | 1.77±0.08a          | 91.5±0.5b           |
|                  | K <sub>180</sub>  | 22.0±0.2a           | 20.5±0.3a           | 1.53±0.06a          | 93.0±0.3a           |
| Cv1              | Zn <sub>0</sub>   | 19.6±0.3a           | 17.2±0.3a           | 2.50±0.13a          | 87.2±0.8a           |
|                  | Zn <sub>150</sub> | 20.0±0.2a           | 17.5±0.3a           | 2.44±0.12a          | 87.7±0.7a           |
|                  | Zn <sub>300</sub> | 20.3±0.2a           | 17.9±0.3a           | 2.36±0.12a          | 88.3±0.7a           |
| Cv2              | Zn <sub>0</sub>   | 21.3±0.4a           | 19.5±0.4a           | 1.74±0.09a          | 91.7±0.6a           |
|                  | Zn <sub>150</sub> | 21.6±0.3a           | 19.9±0.4a           | 1.66±0.10a          | 92.2±0.6a           |
|                  | Zn <sub>300</sub> | 21.8±0.3a           | 20.3±0.4a           | 1.55±0.09a          | 92.8±0.5a           |
| K <sub>120</sub> | Zn <sub>0</sub>   | 19.9±0.4e           | 17.7±0.5a           | 2.26±0.16a          | 88.5±1.0a           |
|                  | Zn <sub>150</sub> | 20.3±0.4d           | 18.1±0.5a           | 2.21±0.16a          | 88.9±0.9a           |
|                  | Zn <sub>300</sub> | 20.6±0.4a           | 18.5±0.5a           | 2.10±0.17a          | 89.6±0.9a           |
| K <sub>180</sub> | Zn <sub>0</sub>   | 21.0±0.3c           | 19.0±0.5a           | 1.98±0.15a          | 90.4±0.8a           |
|                  | Zn <sub>150</sub> | 21.3±0.3b           | 19.4±0.4a           | 1.89±0.15a          | 91.0±0.8a           |
|                  | Zn <sub>300</sub> | 21.5±0.3a           | 19.7±0.5a           | 1.82±0.15a          | 91.4±0.8a           |
| <i>p</i> -value  | Cv x K            | 0.216 <sup>ns</sup> | 0.079 <sup>ns</sup> | 0.097 <sup>ns</sup> | 0.011 <sup>*</sup>  |
|                  | Cv x Z            | 0.646 <sup>ns</sup> | 0.961 <sup>ns</sup> | 0.179 <sup>ns</sup> | 0.964 <sup>ns</sup> |
|                  | K x Z             | 0.050 <sup>*</sup>  | 0.068 <sup>ns</sup> | 0.157 <sup>ns</sup> | 0.125 <sup>ns</sup> |
|                  | Cv x K x Zn       | 0.693 <sup>ns</sup> | 0.731 <sup>ns</sup> | 0.204 <sup>ns</sup> | 0.447 <sup>ns</sup> |

\*, \*\* refer to the significant difference at  $p \leq 0.05$  and  $p \leq 0.01$ , respectively; and "ns" refers to non-significant difference. Means sharing the same letter in each column are not significantly different according to Duncan's multiple range test.

**Table S3.** Sodium (Na), potassium (K),  $\alpha$ -amino N, and alkalinity index of sugar beet as affected by the interactions of two sugar beet cultivars [e.g., Kawemira (Cv1) and BTS 301 (Cv2)] grown under different fertilizer levels of potassium [e.g., 120 (K<sub>120</sub>) and 180 kg ha<sup>-1</sup> (K<sub>180</sub>)] and foliar zinc [e.g., 0 (Zn<sub>0</sub>), 150 (Zn<sub>150</sub>), and 300 ppm (Zn<sub>300</sub>)] under saline soil (EC<sub>e</sub> = 8.60 dS m<sup>-1</sup>) conditions (data pooled over both seasons).

| Treatment        |                   | Na                       | K                     | $\alpha$ -amino N      | Alkalinity index      |
|------------------|-------------------|--------------------------|-----------------------|------------------------|-----------------------|
|                  |                   | (mmol kg <sup>-1</sup> ) |                       |                        |                       |
| Cv1              | K <sub>120</sub>  | 26.9±0.1 <sup>a</sup>    | 36.6±0.2 <sup>a</sup> | 14.8±0.03 <sup>a</sup> | 3.35±0.2 <sup>c</sup> |
|                  | K <sub>180</sub>  | 22.4±0.1 <sup>b</sup>    | 31.2±0.2 <sup>a</sup> | 14.0±0.03 <sup>b</sup> | 3.87±0.2 <sup>b</sup> |
| Cv2              | K <sub>120</sub>  | 14.5±0.1 <sup>c</sup>    | 25.5±0.2 <sup>a</sup> | 12.0±0.03 <sup>c</sup> | 4.35±0.2 <sup>a</sup> |
|                  | K <sub>180</sub>  | 12.7±0.1 <sup>d</sup>    | 21.0±0.2 <sup>a</sup> | 8.9±0.02 <sup>d</sup>  | 3.89±0.3 <sup>b</sup> |
| Cv1              | Zn <sub>0</sub>   | 25.4±0.2 <sup>a</sup>    | 35.0±0.2 <sup>a</sup> | 14.7±0.04 <sup>a</sup> | 3.67±0.3 <sup>a</sup> |
|                  | Zn <sub>150</sub> | 24.8±0.2 <sup>b</sup>    | 34.0±0.2 <sup>a</sup> | 14.4±0.04 <sup>b</sup> | 3.62±0.3 <sup>a</sup> |
|                  | Zn <sub>300</sub> | 23.8±0.1 <sup>c</sup>    | 32.8±0.2 <sup>a</sup> | 14.1±0.04 <sup>c</sup> | 3.53±0.3 <sup>a</sup> |
| Cv2              | Zn <sub>0</sub>   | 14.2±0.1 <sup>d</sup>    | 25.0±0.3 <sup>a</sup> | 10.9±0.06 <sup>d</sup> | 4.16±0.3 <sup>a</sup> |
|                  | Zn <sub>150</sub> | 13.7±0.1 <sup>e</sup>    | 23.4±0.3 <sup>a</sup> | 10.5±0.06 <sup>e</sup> | 4.14±0.3 <sup>a</sup> |
|                  | Zn <sub>300</sub> | 12.9±0.1 <sup>f</sup>    | 21.3±0.3 <sup>a</sup> | 10.0±0.06 <sup>f</sup> | 4.06±0.3 <sup>a</sup> |
| K <sub>120</sub> | Zn <sub>0</sub>   | 21.3±0.2 <sup>a</sup>    | 32.3±0.3 <sup>a</sup> | 13.8±0.05 <sup>a</sup> | 3.88±0.3 <sup>a</sup> |
|                  | Zn <sub>150</sub> | 20.9±0.2 <sup>b</sup>    | 31.5±0.3 <sup>a</sup> | 13.4±0.05 <sup>a</sup> | 3.90±0.3 <sup>a</sup> |
|                  | Zn <sub>300</sub> | 19.8±0.2 <sup>c</sup>    | 29.4±0.3 <sup>a</sup> | 13.0±0.06 <sup>a</sup> | 3.77±0.3 <sup>a</sup> |
| K <sub>180</sub> | Zn <sub>0</sub>   | 18.3±0.2 <sup>d</sup>    | 27.7±0.2 <sup>a</sup> | 11.8±0.08 <sup>a</sup> | 3.95±0.3 <sup>a</sup> |
|                  | Zn <sub>150</sub> | 17.6±0.2 <sup>e</sup>    | 25.9±0.3 <sup>a</sup> | 11.5±0.08 <sup>a</sup> | 3.86±0.3 <sup>a</sup> |
|                  | Zn <sub>300</sub> | 16.8±0.2 <sup>f</sup>    | 24.7±0.3 <sup>a</sup> | 11.1±0.09 <sup>a</sup> | 3.82±0.3 <sup>a</sup> |
| <i>p</i> -value  | Cv x K            | <0.001 <sup>**</sup>     | 0.585 <sup>ns</sup>   | <0.001 <sup>**</sup>   | <0.001 <sup>**</sup>  |
|                  | Cv x Z            | 0.024 <sup>*</sup>       | 0.128 <sup>ns</sup>   | 0.002 <sup>**</sup>    | 0.712 <sup>ns</sup>   |
|                  | K x Z             | 0.004 <sup>**</sup>      | 0.377 <sup>ns</sup>   | 0.534 <sup>ns</sup>    | 0.135 <sup>ns</sup>   |
|                  | Cv x K x Zn       | 0.031 <sup>**</sup>      | 0.137 <sup>ns</sup>   | 0.181 <sup>ns</sup>    | 0.504 <sup>ns</sup>   |

\*, \*\* refer to the significant difference at  $p \leq 0.05$  and  $p \leq 0.01$ , respectively; and "ns" refers to non-significant difference. Means sharing the same letter in each column are not significantly different according to Duncan's multiple range test.

**Table S4.** Root yield (RY), top yield (TY), biological yield (BY), and gross sugar yield (GSY) of sugar beet as affected by the interactions of two cultivars [e.g., Kawemira (Cv1) and BTS 301 (Cv2)] grown under different fertilizer levels of potassium [e.g., 120 (K<sub>120</sub>) and 180 kg ha<sup>-1</sup> (K<sub>180</sub>)] and foliar zinc [e.g., 0 (Zn<sub>0</sub>), 150 (Zn<sub>150</sub>), and 300 ppm (Zn<sub>300</sub>)] under saline soil (EC<sub>e</sub> = 8.60 dS m<sup>-1</sup>) conditions (data pooled over both seasons).

| Treatment       |                   | RY                    | TY                  | BY                  | GSY                 |
|-----------------|-------------------|-----------------------|---------------------|---------------------|---------------------|
|                 |                   | (t ha <sup>-1</sup> ) |                     |                     |                     |
| Cv1             | K <sub>120</sub>  | 51.0±0.9a             | 16.3±0.4a           | 67.3±1.3a           | 10.8±0.20a          |
|                 | K <sub>180</sub>  | 58.8±1.6a             | 19.6±0.5a           | 78.4±2.1a           | 12.9±0.27a          |
| Cv2             | K <sub>120</sub>  | 57.9±1.0a             | 21.5±0.8a           | 79.4±1.5a           | 11.3±0.24a          |
|                 | K <sub>180</sub>  | 65.8±1.5a             | 24.9±0.6a           | 90.7±1.5a           | 13.5±0.32a          |
| Cv1             | Zn <sub>0</sub>   | 53.0±2.1a             | 16.6±0.8a           | 69.6±2.9a           | 11.3±0.48a          |
|                 | Zn <sub>150</sub> | 55.2±1.9a             | 18.2±0.6a           | 73.4±2.4a           | 11.9±0.38a          |
|                 | Zn <sub>300</sub> | 56.6±1.9a             | 18.9±0.6a           | 75.5±2.6a           | 12.3±0.38a          |
| Cv2             | Zn <sub>0</sub>   | 59.8±2.1a             | 21.9±1.2a           | 81.7±2.9a           | 11.8±0.50a          |
|                 | Zn <sub>150</sub> | 62.1±1.8a             | 23.4±0.8a           | 85.5±2.1a           | 12.4±0.45a          |
|                 | Zn <sub>300</sub> | 63.7±1.9a             | 24.2±0.8a           | 87.9±2.2a           | 12.9±0.45a          |
| <i>p</i> -value | Cv x K            | 0.841 <sup>ns</sup>   | 0.832 <sup>ns</sup> | 0.822 <sup>ns</sup> | 0.60 <sup>ns</sup>  |
|                 | Cv x Z            | 0.321 <sup>ns</sup>   | 0.353 <sup>ns</sup> | 0.216 <sup>ns</sup> | 0.231 <sup>ns</sup> |
|                 | Cv x K x Zn       | 0.222 <sup>ns</sup>   | 0.634 <sup>ns</sup> | 0.405 <sup>ns</sup> | 0.173 <sup>ns</sup> |

\*, \*\* refer to the significant difference at  $p \leq 0.05$  and  $p \leq 0.01$ , respectively; and "ns" refers to non-significant difference. Means sharing the same letter in each column are not significantly different according to Duncan's multiple range test.

**Table S5.** Potassium use efficiencies based on root yield (R-KUE) and pure sugar yield (S-KUE) of sugar beet as affected by the interactions of two cultivars [e.g., Kawemira (Cv1) and BTS 301 (Cv2)] grown under different fertilizer levels of potassium [e.g., 120 (K<sub>120</sub>) and 180 kg ha<sup>-1</sup> (K<sub>180</sub>)] and foliar zinc [e.g., 0 (Zn<sub>0</sub>), 150 (Zn<sub>150</sub>), and 300 ppm (Zn<sub>300</sub>)] under saline soil (EC<sub>e</sub> = 8.60 dS m<sup>-1</sup>) conditions (data pooled over both seasons).

| Treatment       |                   | PSY<br>(t ha <sup>-1</sup> ) | R-KUE<br>(kg roots kg k <sup>-1</sup> ) | S-KUE<br>(kg sugar kg k <sup>-1</sup> ) |
|-----------------|-------------------|------------------------------|-----------------------------------------|-----------------------------------------|
| Cv1             | K <sub>120</sub>  | 9.9±0.22 <sup>a</sup>        | 0.43±0.008 <sup>b</sup>                 | 0.082±0.002 <sup>a</sup>                |
|                 | K <sub>180</sub>  | 12.0±0.22 <sup>a</sup>       | 0.33±0.009 <sup>d</sup>                 | 0.067±0.001 <sup>a</sup>                |
| Cv2             | K <sub>120</sub>  | 9.7±0.23 <sup>a</sup>        | 0.48±0.008 <sup>a</sup>                 | 0.081±0.002 <sup>a</sup>                |
|                 | K <sub>180</sub>  | 12.0±0.27 <sup>a</sup>       | 0.37±0.009 <sup>c</sup>                 | 0.067±0.002 <sup>a</sup>                |
| Cv1             | Zn <sub>0</sub>   | 10.4±0.46 <sup>a</sup>       | 0.36±0.014 <sup>a</sup>                 | 0.070±0.002 <sup>a</sup>                |
|                 | Zn <sub>150</sub> | 11.0±0.37 <sup>a</sup>       | 0.38±0.018 <sup>a</sup>                 | 0.075±0.003 <sup>a</sup>                |
|                 | Zn <sub>300</sub> | 11.4±0.35 <sup>a</sup>       | 0.39±0.020 <sup>a</sup>                 | 0.078±0.003 <sup>a</sup>                |
| Cv2             | Zn <sub>0</sub>   | 10.3±0.48 <sup>a</sup>       | 0.41±0.017 <sup>a</sup>                 | 0.070±0.003 <sup>a</sup>                |
|                 | Zn <sub>150</sub> | 10.9±0.42 <sup>a</sup>       | 0.43±0.021 <sup>a</sup>                 | 0.074±0.003 <sup>a</sup>                |
|                 | Zn <sub>300</sub> | 11.4±0.42 <sup>a</sup>       | 0.44±0.022 <sup>a</sup>                 | 0.078±0.003 <sup>a</sup>                |
| <i>p</i> -value | Cv x K            | 0.552 <sup>ns</sup>          | 0.002 <sup>**</sup>                     | 0.401 <sup>ns</sup>                     |
|                 | Cv x Z            | 0.736 <sup>ns</sup>          | 0.428 <sup>ns</sup>                     | 0.869 <sup>ns</sup>                     |
|                 | Cv x K x Zn       | 0.065 <sup>ns</sup>          | 0.277 <sup>ns</sup>                     | 0.122 <sup>ns</sup>                     |

\*, \*\* refer to the significant difference at  $p \leq 0.05$  and  $p \leq 0.01$ , respectively; and "ns" refers to non-significant difference. Means sharing the same letter in each column are not significantly different according to Duncan's multiple range test.
